# Supplementary material
Source: HighWire-hosted journal article supplement (https://erj.ersjournals.com/content/55/3/1901467)
Supplement: inline-supplementary-material-1 [file inline-supplementary-material-1.pdf]

**Appendix Table A1: Outcome definitions from cohort studies of shorter regimens**

| No | Study, Ref    | Cure                                                                                                                                                                                                                                                                                                                                                                                                                | Treatment Completed                                                                                                                                                                                                                                                                                                                                                                                                                                                                                                                                                                                                                                                                     | Treatment Failure                                                                                                                                                                                                                                                                                                                                              | Lost to follow-up (default)                                                                                                                                            | Relapse                                                                                                                                                                                                                                                                                                                                                                                                                                                                                                                                                                    |
|----|---------------|---------------------------------------------------------------------------------------------------------------------------------------------------------------------------------------------------------------------------------------------------------------------------------------------------------------------------------------------------------------------------------------------------------------------|-----------------------------------------------------------------------------------------------------------------------------------------------------------------------------------------------------------------------------------------------------------------------------------------------------------------------------------------------------------------------------------------------------------------------------------------------------------------------------------------------------------------------------------------------------------------------------------------------------------------------------------------------------------------------------------------|----------------------------------------------------------------------------------------------------------------------------------------------------------------------------------------------------------------------------------------------------------------------------------------------------------------------------------------------------------------|------------------------------------------------------------------------------------------------------------------------------------------------------------------------|----------------------------------------------------------------------------------------------------------------------------------------------------------------------------------------------------------------------------------------------------------------------------------------------------------------------------------------------------------------------------------------------------------------------------------------------------------------------------------------------------------------------------------------------------------------------------|
| 1  | Van Deun Aung | Completed treatment without evidence of failure clinically and bacteriologically (negative $\geq 3$ occasions over 5 months, and 1 of those taken at the end of treatment) <sup>1</sup>                                                                                                                                                                                                                             | Full course of treatment completed but incomplete documentation by sputum smears according to the criteria of cure.                                                                                                                                                                                                                                                                                                                                                                                                                                                                                                                                                                     | <ul style="list-style-type: none"> <li>•Treatment stopped at <math>\geq 6</math> months due to lack of response, or</li> <li>•Patients reverting to active TB without interruption of treatment with bacteriological evidence, or</li> <li>•Treatment definitively stopped for <math>\geq 2</math> drugs because of side-effects</li> </ul>                    | Interruption of treatment for at least 2 months.                                                                                                                       | Recurrence clinically and bacteriological positive, and/ confirmed by positive culture on at least two sputum specimens after cure or treatment completion, unless shown by fingerprinting to represent a different strain from baseline                                                                                                                                                                                                                                                                                                                                   |
| 2  | Uzbekistan    | <ul style="list-style-type: none"> <li>•Completed treatment according to programme protocol</li> <li>•<math>\geq 4</math> negative cultures from samples collected at least 30 days apart within the final 5 months of treatment</li> <li>•1 positive culture permitted if followed by <math>\geq 3</math> consecutive negative cultures taken at least 30 days apart in the final 3 months of treatment</li> </ul> | An MDR TB patient who has completed treatment according to programme protocol but does not meet the definition for cure because of lack of bacteriological results (i.e. fewer than five cultures were performed in the final months of treatment) or otherwise, completion of treatment with documented bacteriological conversion persisting through the end of treatment, but fewer than five negative cultures.                                                                                                                                                                                                                                                                     | <ul style="list-style-type: none"> <li>•No negative culture by the end of month 5 of a prolonged intensive phase,</li> <li>•2 cultures positive during the continuation phase or 1 culture positive during the last 3 months of treatment,</li> <li>• Early treatment termination because of poor response or adverse events</li> </ul>                        | An MDR TB patient who dies for any reason during the course of MDR TB treatment and is not already classified as a treatment failure prior to death.                   | An MDR TB patient who meets the criteria of cured or completed short course of treatment and at any time during the follow up period (first year after treatment completion) is subsequently diagnosed with at least one sample of bacteriologically positive TB by culture                                                                                                                                                                                                                                                                                                |
| 3  | Swaziland     | <ul style="list-style-type: none"> <li>•Completed treatment according to programme protocol</li> <li>•<math>\geq 5</math> consecutive negative cultures from samples collected at least 30 days apart</li> <li>•1 positive culture permitted if followed by <math>\geq 3</math> consecutive negative cultures taken at least 30 days apart</li> </ul>                                                               | An MDR TB patient who has completed treatment according to programme protocol but does not meet the definition for cure because of lack of bacteriological results (i.e. fewer than five cultures were performed in the final months of treatment) or otherwise, completion of treatment with documented bacteriological conversion persisting through the end of treatment, but fewer than five negative cultures. Treatment completion will only be an outcome for patients that are not able to produce sputum; in case of patients where the lack of bacteriological results is due to other reasons the outcome will be registered as “other” in order to avoid misclassification. | <ul style="list-style-type: none"> <li>•No negative culture by the end of month 6 of a prolonged intensive phase,</li> <li>•Culture positive during the continuation phase: 2 cultures positive (continuation phase) or 1 culture positive (last 3 months),</li> <li>• Early treatment termination because of poor response or adverse events</li> </ul>       | An MDR TB patient whose treatment was interrupted for two or more consecutive months for any reason without medical approval and not meeting the criteria for failure. | Relapse: An MDR TB patient who meets the criteria of cured or completed short course of treatment and at any time during the follow up period (first year after treatment completion) is subsequently diagnosed with at least one sample of bacteriologically positive MDR TB by culture and DST of the same strain found in initial diagnosis, proven by molecular techniques (Mycobacterium tuberculosis DNA fingerprinting).<br>Re-infection: recurrent disease as defined for a relapse, with a strain showing a molecular pattern different from the initial isolate. |
| 4  | Kuaban        | <ul style="list-style-type: none"> <li>•Completed treatment according to the programme’s protocol and has <math>\geq 5</math> consecutive negative cultures, each at least 30 days apart</li> <li>•1 positive culture permitted if followed by <math>\geq 3</math> consecutive negative cultures taken at least 30 days apart</li> </ul>                                                                            | An MDR-TB patient who has completed treatment according to country protocol but does not meet the definition for cure or treatment failure due to lack of bacteriological results (i.e. fewer than five cultures were performed in the final 8 months of therapy).                                                                                                                                                                                                                                                                                                                                                                                                                      | <ul style="list-style-type: none"> <li>•Regimen change</li> <li>•Lack of bacteriological response and lack of clinical improvement at 6 months of treatment, or</li> <li>•Bacteriological reversion with concomitant clinical deterioration after initial response occurring after at least 6 months of treatment, or</li> <li>•Adverse drug events</li> </ul> | An MDR patient whose treatment was interrupted for two or more consecutive months for any reason without medical approval.                                             | Patient having been declared “cured” or “treatment completed” presenting with a new episode of TB disease (whatever form of TB also instructions where given to declare “relapse” preferentially in bacteriologically confirmed cases)                                                                                                                                                                                                                                                                                                                                     |
| 5  | Piubello      | •Completed treatment                                                                                                                                                                                                                                                                                                                                                                                                | Treatment completed with                                                                                                                                                                                                                                                                                                                                                                                                                                                                                                                                                                                                                                                                | $\geq 2/5$ cultures                                                                                                                                                                                                                                                                                                                                            | A patient whose                                                                                                                                                        | Patient having been declared                                                                                                                                                                                                                                                                                                                                                                                                                                                                                                                                               |

<sup>1</sup> Exclude: positive cultures representing different strain from baseline

|   |              |                                                                                                                                                                                                                                                                                                                                                                                                                                                                       |                                                                                                                                                                                                                                                                                                                         |                                                                                                                                                                                                                                                                                                                                                                      |                                                                                                                                            |                                                                                                                                                                                                                                                                                                                                                                                                                                     |
|---|--------------|-----------------------------------------------------------------------------------------------------------------------------------------------------------------------------------------------------------------------------------------------------------------------------------------------------------------------------------------------------------------------------------------------------------------------------------------------------------------------|-------------------------------------------------------------------------------------------------------------------------------------------------------------------------------------------------------------------------------------------------------------------------------------------------------------------------|----------------------------------------------------------------------------------------------------------------------------------------------------------------------------------------------------------------------------------------------------------------------------------------------------------------------------------------------------------------------|--------------------------------------------------------------------------------------------------------------------------------------------|-------------------------------------------------------------------------------------------------------------------------------------------------------------------------------------------------------------------------------------------------------------------------------------------------------------------------------------------------------------------------------------------------------------------------------------|
|   |              | and $\geq 5$ consecutive negative cultures collected at least 30 days apart during the last 8 months of treatment, or<br>• 1 positive culture without concurrent clinical deterioration, followed by $\geq 4$ consecutive negative cultures (2008-2013)<br>• Treatment completed as recommended by the national policy without evidence of failure, and $\geq 3$ consecutive cultures taken at least 30 days apart are negative after the intensive phase (2014-2016) | documented bacteriological conversion but not meeting the definition for cure (2008-2013). Treatment completed as recommended by the national policy without evidence of failure BUT no record that three or more consecutive cultures taken at least 30 days apart are negative after the intensive phase (2014-2016). | positive in the final 8 months of treatment, or<br>• 1 of the final 3 cultures positive, or<br>• Treatment stopped definitively due to adverse drug reactions, terminated or permanent regimen change                                                                                                                                                                | treatment was interrupted for 2 consecutive months or more                                                                                 | cured or treatment completed with a positive culture during the 24 months follow-up after cure except if molecular tests prove an infection with a different strain from the initial (2008-2014).<br>Patient having been declared cured or treatment completed with a positive culture during the 12 months follow-up after cure except if molecular tests prove an infection with a different strain from the initial (2015-2016). |
| 6 | Trebuq       | • Completed treatment without evidence of failure and $\geq 3$ consecutive negative cultures taken at least 30 days apart                                                                                                                                                                                                                                                                                                                                             | Same as latest WHO definition                                                                                                                                                                                                                                                                                           | • Positive culture after 6 months of treatment (except when preceded by 1 negative and followed by at least 2 negative cultures)                                                                                                                                                                                                                                     | Same as latest WHO definition                                                                                                              | Same as latest WHO definition                                                                                                                                                                                                                                                                                                                                                                                                       |
| 7 | Tajikistan   | • Completed treatment as recommended by the national policy without evidence of failure, and<br>• $\geq 3$ consecutive negative cultures taken at least 30 days apart after the intensive phase                                                                                                                                                                                                                                                                       | Treatment completed as recommended by the national policy without evidence of failure BUT no record that 3 or more consecutive cultures taken at least 30 days apart, are negative after the intensive phase.                                                                                                           | • Treatment terminated or need for permanent regimen change of $\geq 2$ anti-TB drugs because of:<br>• Lack of conversion by the end of intensive phase, or<br>• Bacteriological (i.e. culture) reversion in the continuation phase after the conversion to negative, or<br>• Evidence of additional acquired resistance to FQ or SL, or<br>• Adverse drug reactions | A patient whose treatment was interrupted for two consecutive months or more.                                                              | A DR-TB patient who meets the criteria of cured or completed short course of treatment and at any time within the first year after treatment completion is subsequently diagnosed with at least one sample of bacteriologically positive DR-TB by culture and DST.                                                                                                                                                                  |
| 8 | Kyrgyzstan   | • Completed treatment as recommended by the national policy without evidence of failure, and<br>• $\geq 3$ consecutive negative cultures taken at least 30 days apart after the intensive phase                                                                                                                                                                                                                                                                       | Treatment completed as recommended by the national policy without evidence of failure BUT no record that three or more consecutive cultures taken at least 30 days apart are negative after the intensive phase.                                                                                                        | Treatment terminated or permanent regimen change of $\geq 2$ anti-TB drugs because of:<br>• Lack of conversion by the end of intensive phase, or<br>• Bacteriological reversion in the continuation phase after conversion to negative, or<br>• Evidence of additional acquired resistance to FQ or SL, or<br>• Adverse drug reactions                               | A patient whose treatment was interrupted for 2 consecutive months or more (note: this is called lost to follow-up; "default" is not used) | Not defined                                                                                                                                                                                                                                                                                                                                                                                                                         |
| 9 | South Africa | • Completed treatment of $\geq 9$ months<br>• TB culture conversion<br>• $\geq 3$ consecutive                                                                                                                                                                                                                                                                                                                                                                         | • A patient who has had TB culture conversion<br>• Received treatment for a total duration of 9 months or more                                                                                                                                                                                                          | • Patient failed to culture convert by month 4<br>• In final 6 months of                                                                                                                                                                                                                                                                                             | A patient with Treatment interrupted for: a. $\geq 2$                                                                                      | Not an outcome in the programme                                                                                                                                                                                                                                                                                                                                                                                                     |

|  |  |                                                                                                                   |                                                                                                                                       |                                                                                                                                                                                            |                                                              |  |
|--|--|-------------------------------------------------------------------------------------------------------------------|---------------------------------------------------------------------------------------------------------------------------------------|--------------------------------------------------------------------------------------------------------------------------------------------------------------------------------------------|--------------------------------------------------------------|--|
|  |  | negative TB cultures during continuation phase (at least 30 days apart)<br>•No evidence of clinical deterioration | •Has less than 3 consecutive negative TB Cultures during continuation phase (30 days apart)<br>•No evidence of clinical deterioration | treatment $\geq 2$ of 5 cultures are positive, clinical condition deteriorating<br>• Treatment stopped on clinical grounds<br>• $\geq 2$ new drugs added because of poor clinical response | consecutive months<br>b. Any reason without medical approval |  |
|--|--|-------------------------------------------------------------------------------------------------------------------|---------------------------------------------------------------------------------------------------------------------------------------|--------------------------------------------------------------------------------------------------------------------------------------------------------------------------------------------|--------------------------------------------------------------|--|

**Appendix Table A2. Quality assessment of included studies of (a) standardised shorter regimens, and (b) longer regimens.**

**Table A2a.**

| Shorter Regimen Database     | Sampling method <sup>†</sup> | Info on DST SLI | Info on DST FQN | Participation rate <sup>¶</sup> | Lost to follow-up rate | Outcome definitions <sup>°</sup> | Info on Age | Info on HIV <sup>††</sup> | Info on TB Tx history | Quality  |
|------------------------------|------------------------------|-----------------|-----------------|---------------------------------|------------------------|----------------------------------|-------------|---------------------------|-----------------------|----------|
| Bangladesh <sup>1,2</sup>    | Census                       | 93%             | 93%             | 100%                            | 7%                     | Study specific                   | 100%        | Not applied               | 100%                  | High     |
| Uzbekistan MSF <sup>3</sup>  | Census                       | 78%             | 82%             | 100%                            | 10%                    | Study specific /WHO 2013         | 100%        | Not applied               | 100%                  | Moderate |
| Swaziland MSF <sup>4</sup>   | Census                       | 53%             | 55%             | 100%                            | 0%                     | Study specific /WHO 2013         | 100%        | 100%                      | 23%                   | Moderate |
| Cameroon <sup>5</sup>        | Census                       | 79%             | 79%             | 100%                            | 2%                     | Study specific                   | 100%        | 99%                       | 98%                   | Moderate |
| Niger <sup>6</sup>           | Census                       | 98%             | 97%             | 100%                            | 2%                     | Study specific                   | 100%        | 96%                       | 100%                  | High     |
| Union 9 country <sup>7</sup> | Census                       | 58%             | 59%             | 98%                             | 5%                     | Study specific/WHO 2013          | 100%        | 100%                      | 100%                  | Moderate |
| *Tajikistan <sup>8</sup>     | Census                       | 82%             | 82%             | 100%                            | 6%                     | WHO 2013                         | 100%        | Not applied               | 6%                    | High     |
| *Kyrgyzstan <sup>9</sup>     | Convenience                  | 100%            | 100%            | 27%                             | 0%                     | WHO 2013                         | 100%        | Not applied               | 100%                  | Moderate |
| *South Africa <sup>10</sup>  | Census                       | 0%              | 0%              | 20%                             | 12%                    | WHO 2013                         | 100%        | 94%                       | 100%                  | Moderate |

For methodological details see: Ahmad N, Ahuja SD, Akkerman OW, Alffenaar JW, et al. “Treatment correlates of successful outcomes in pulmonary multidrug-resistant tuberculosis: an individual patient data meta-analysis.” *Lancet* 2018; 392 (10150): 821-34. 2018 Sep 1.

\* Studies identified through WHO public call for data.

<sup>†</sup>*Census* if all patients treated with shorter regimens at centre or in study provided in database; *Convenience* if neither census or random sample & uncertain on representativeness of the sample of patients provided.

<sup>¶</sup>Participation rate is the number of patients on shorter regimen treatment provided in datasets by investigators divided by the total number of patients treated with the shorter regimen at their centre during the study period, expressed as a percentage.

<sup>°</sup>All studies received full point for Outcome definitions as they were judged similar to WHO 2013.

<sup>††</sup>For HIV, quality judged adequate despite low rate of testing in Bangladesh, Uzbekistan, Tajikistan, and Kyrgyzstan, given low HIV prevalence settings.

Each quality criteria counts for 1 point, with the exception of % Lost where 2 points are given if  $\leq 10\%$ , 1 point if between 10% and 20%, and 0 points if  $> 20\%$ .

**High** = 2 points from critical criteria (Sampling method Census/Random;  $\geq 80\%$  of patients with DST on either a fluoroquinolone or second-line injectable) + 5 points from other criteria; **Moderate** = 1 point from critical criteria (Sampling method Census/Random;  $\geq 80\%$  of patients with DST on either a fluoroquinolone or second-line injectable) + 5 points from other criteria; or 2 from critical + 4 from other; **Low** = not meeting criteria for High or Moderate.

**Appendix Table A2b.**

| Contact person                    | Sampling method | Info on DST-SLI | Info on DST-FQN | Participation rate | Lost to follow-up rate | Outcome definition   | Info on age | Info on HIV | Info on TB Tx history | Quality  |
|-----------------------------------|-----------------|-----------------|-----------------|--------------------|------------------------|----------------------|-------------|-------------|-----------------------|----------|
| Ahuja <sup>11</sup>               | Random          | 92.4%           | 92.4%           | 100%               | 19.0%                  | Laserson             | 100%        | 80.0%       | 100%                  | High     |
| Anderson <sup>12</sup>            | Census          | 100%            | 100%            | 100%               | 12.4%                  | Neither Laserson/WHO | 100%        | 100%        | 90.5%                 | High     |
| *Fox <sup>13</sup>                | Census          | 93.1%           | 96.6%           | 100%               | 3.4%                   | WHO 2013             | 100%        | 100%        | 100%                  | High     |
| Bang <sup>14</sup>                | Census          | 96.6%           | 93.1%           | 96.7%              | 17.2%                  | Laserson             | 100%        | 100%        | 100%                  | High     |
| Barry/Flood (Calif) <sup>15</sup> | Unclear         | 98.4%           | 95.2%           | 100%               | 4.8%                   | WHO 2013             | 98.4%       | 100%        | 100%                  | Moderate |
| Bonnet <sup>16</sup>              | Census          | 93.3%           | 93.3%           | 100%               | 41.3%                  | Laserson             | 100%        | 11.5%       | 98.6%                 | High     |
| *Rodrigues <sup>17</sup>          | Census          | 87%             | 85%             | 100%               | 10%                    | Laserson             | 100%        | 98%         | 100%                  | High     |
| Brode <sup>18</sup>               | Census          | 100%            | 100%            | 100%               | 0.0%                   | Laserson             | 100%        | 100%        | 100%                  | High     |
| Cegielski <sup>19,20</sup>        | Census          | 92.8%           | 92.2%           | 60.1%              | 19.8%                  | Laserson             | 100%        | 68.3%       | 98.2%                 | High     |
| Chan <sup>21</sup>                | Census          | 100%            | 100%            | 100%               | 26.7%                  | Laserson             | 100%        | 80.0%       | 100%                  | High     |
| *endTB <sup>22</sup>              | Census          | 95.2%           | 95.2%           | 100%               | 17.5%                  | Laserson/WHO         | 100%        | 100%        | 100%                  | High     |
| Guglielmetti <sup>23,24</sup>     | Census          | 100%            | 100%            | 100%               | 11.1%                  | WHO 2013             | 100%        | 100%        | 100%                  | High     |
| Isaakidis <sup>25,26</sup>        | Census          | 96.7%           | 95.4%           | 100%               | 11.8%                  | Laserson             | 100%        | 100%        | 98.0%                 | High     |
| Jarlsberg <sup>27</sup>           | Census          | 96.4%           | 96.4%           | 100%               | 3.6%                   | Laserson             | 100%        | 92.9%       | 100.0%                | High     |
| Kempker <sup>28</sup>             | Census          | 100%            | 100%            | 94.9%              | 32.7%                  | Laserson             | 100%        | 94.7%       | 100%                  | High     |
| Koenig <sup>29</sup>              | Census          | 96.3%           | 93.3%           | 100%               | 6.1%                   | Laserson             | 99.4%       | 100%        | 100%                  | High     |
| Koh <sup>30,31</sup>              | Census          | 100%            | 100%            | 100%               | 13.4%                  | WHO 2013             | 100%        | 100%        | 100%                  | High     |
| Lange <sup>32</sup>               | Census          | 94.0%           | 96.7%           | 100%               | 20.1%                  | Laserson             | 100%        | 99.5%       | 98.4%                 | High     |
| Laniado-Laborin <sup>33</sup>     | Census          | 100%            | 100%            | 100%               | 13.5%                  | Laserson             | 100%        | 100%        | 100%                  | High     |
| *Kuksa <sup>34</sup>              | Census          | 100%            | 100%            | 100%               | 15%                    | Laserson             | 100%        | 100%        | 100%                  | High     |
| *Barkane <sup>35</sup>            | Census          | 100%            | 100%            | 100%               | 15.6%                  | Laserson             | 100%        | 100%        | 100%                  | High     |
| Leung <sup>36,37</sup>            | Census          | 100%            | 100%            | 100%               | 19.9%                  | Laserson             | 100%        | 100%        | 100%                  | High     |
| Marks <sup>38</sup>               | Random          | 92.3%           | 91.5%           | 100%               | 12.3%                  | Neither Laserson/WHO | 100%        | 85.4%       | 100%                  | High     |
| Migliori <sup>39,40</sup>         | Census          | 96.6%           | 96.6%           | Unclear            | 10.9%                  | WHO 2013             | 100%        | 98.1%       | 99.3%                 | High     |
| Migliori <sup>41</sup>            | Census          | 97.0%           | 100%            | Unclear            | 3.7%                   | WHO 2013             | 100%        | 99.3%       | 100%                  | High     |
| Milanov <sup>42</sup>             | Census          | 94.0%           | 94.0%           | 100%               | 2.0%                   | Laserson             | 100%        | 100%        | 100%                  | High     |
| *Ndjeka <sup>43</sup>             | Census          | 100%            | 100%            | 100%               | 18.5%                  | Laserson/WHO         | 100%        | 100%        | 100%                  | High     |
| Ndjeka <sup>44</sup>              | Unclear         | 78.2%           | 81.2%           | Unclear            | 21.1%                  | Laserson             | 100%        | 95.5%       | 0.0%                  | Low      |
| Podewils <sup>45</sup>            | Census          | 91.0%           | 91.2%           | 100%               | 15.2%                  | Laserson             | 100%        | 55.6%       | 100%                  | High     |
| Riekstina/Leimane <sup>46</sup>   | Census          | 100%            | 100%            | 100%               | 14.7%                  | Laserson             | 100%        | 94.0%       | 100%                  | High     |
| *Seo <sup>47</sup>                | Census          | 100%            | 100%            | 100%               | 16%                    | Laserson             | 100%        | 100%        | 100%                  | High     |
| Shim <sup>31,48</sup>             | Census          | 100%            | 100%            | 86.4%              | 8.2%                   | WHO 2013             | 100%        | 40%         | 100%                  | High     |
| Smith <sup>49</sup>               | Census          | 100%            | 100%            | 100%               | 21.5%                  | Laserson             | 100%        | 100%        | 98.5%                 | High     |
| TMC207-C208 <sup>50,51</sup>      | RCT             | 84.8%           | 84.8%           | 82.5%              | 28.8%                  | Laserson             | 100%        | 100%        | 100%                  | High     |
| TMC207-C209 <sup>52</sup>         | Census          | 76.1%           | 76.1%           | 93.1%              | 15.2%                  | Laserson             | 100%        | 96.5%       | 100%                  | Moderate |
| van der Werf <sup>53</sup>        | Census          | 100%            | 98.2%           | 100%               | 13.4%                  | Laserson             | 100%        | 92.0%       | 96.4%                 | High     |
| *Vasilyeva <sup>54</sup>          | Census          | 94.4%           | 94.4%           | 100%               | 16%                    | WHO 2013             | 100%        | 100%        | 100%                  | High     |
| *Viiklepp <sup>55</sup>           | Census          | 100%            | 100%            | 100%               | 11.7%                  | Laserson             | 100.0%      | 99.7%       | 100%                  | High     |
| Yim/Kwak <sup>56</sup>            | Census          | 100%            | 100%            | 100%               | 4.9%                   | WHO 2013             | 100%        | 100%        | 100%                  | High     |

For methodological details see: Ahmad N, Ahuja SD, Akkerman OW, Alffenaar JW, et al. “Treatment correlates of successful outcomes in pulmonary multidrug-resistant tuberculosis: an individual patient data meta-analysis.” Lancet 2018; 392 (10150): 821-34. 2018 Sep 1.

\* Studies identified through WHO public call for data.

**Appendix Table A3: Associations between drug-susceptibility test results for pyrazinamide (Pza), ethambutol (Emb), and pro/ethionamide (Pto/Eto)**

**Table A3a: Pyrazinamide and ethambutol resistance (R) & susceptibility (S)**

|              | Emb-R                                   | Emb-S                                   | Total                                      |
|--------------|-----------------------------------------|-----------------------------------------|--------------------------------------------|
| <b>Pza-R</b> | 459<br>(74% of Pza-R)<br>(54% of Emb-R) | 159<br>(26% of Pza-R)<br>(32% of Emb-S) | 618                                        |
| <b>Pza-S</b> | 397<br>(54% of Pza-S)<br>(46% of Emb-R) | 344<br>(46% of Pza-S)<br>(68% of Emb-S) | 741                                        |
| <b>Total</b> | 856                                     | 503                                     | <i>Fisher's p-value for table &lt;.001</i> |

**Table A3b: Pyrazinamide and pro/ethionamide susceptibility**

|              | Pto/Eto-R                                    | Pto/Eto -S                                   | Total                                  |
|--------------|----------------------------------------------|----------------------------------------------|----------------------------------------|
| <b>Pza-R</b> | 127<br>(24% of Pza-R)<br>(51% of Pto/Eto-R)  | 401<br>(76% of Pza-R)<br>(43% of Pto/Eto -S) | 528                                    |
| <b>Pza-S</b> | 124<br>(19% of Pza-S)<br>(49% of Pto/Eto -R) | 520<br>(81% of Pza-S)<br>(57% of Pto/Eto -S) | 644                                    |
| <b>Total</b> | 251                                          | 621                                          | <i>Fisher's p-value for table =.05</i> |

**Table A3c: Ethambutol and pro/ethionamide susceptibility**

|              | Pto/Eto -R                                  | Pto/Eto -S                                  | Total                                  |
|--------------|---------------------------------------------|---------------------------------------------|----------------------------------------|
| <b>Emb-R</b> | 270<br>(22% of Emb-R)<br>(68% of Pto/Eto-R) | 981<br>(78% of Emb-R)<br>(63% of Pto/Eto-S) | 1251                                   |
| <b>Emb-S</b> | 125<br>(18% of Emb-S)<br>(32% of Pto/Eto-R) | 586<br>(82% of Emb-R)<br>(37% of Pto/Eto-S) | 711                                    |
| <b>Total</b> | 395                                         | 1567                                        | <i>Fisher's p-value for table =.04</i> |

**Table A3d: Correlation between pyrazinamide, ethambutol, and pro/ethionamide resistance in patients tested for all 3**

|              | Emb-R                           | Pto/Eto -R                    |
|--------------|---------------------------------|-------------------------------|
| <b>Pza-R</b> | $\rho = 0.22$<br>p-value <.0001 | $\rho = 0.07$<br>p-value=0.02 |
| <b>Emb-R</b> | --                              | $\rho = 0.04$<br>p-value=0.16 |

**Appendix Figure A2. Proportion of Failure/Relapse vs. Success, comparing shorter & longer MDR-TB regimens**

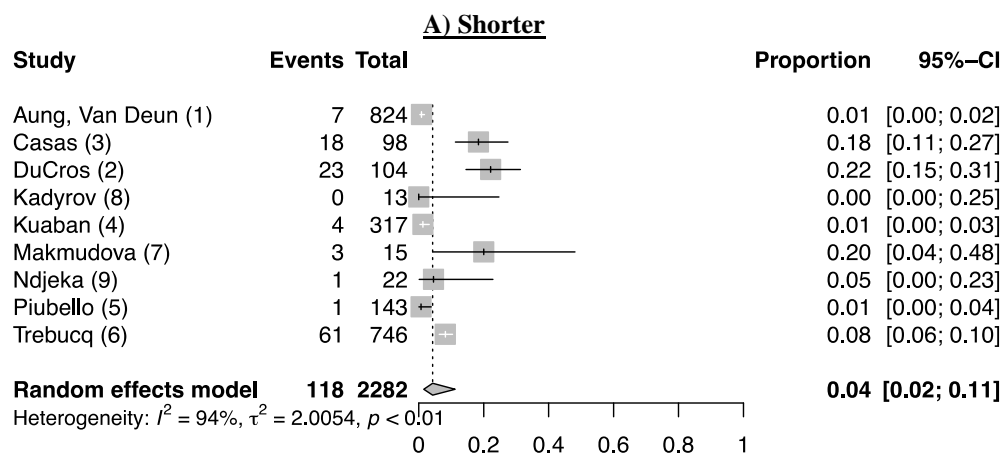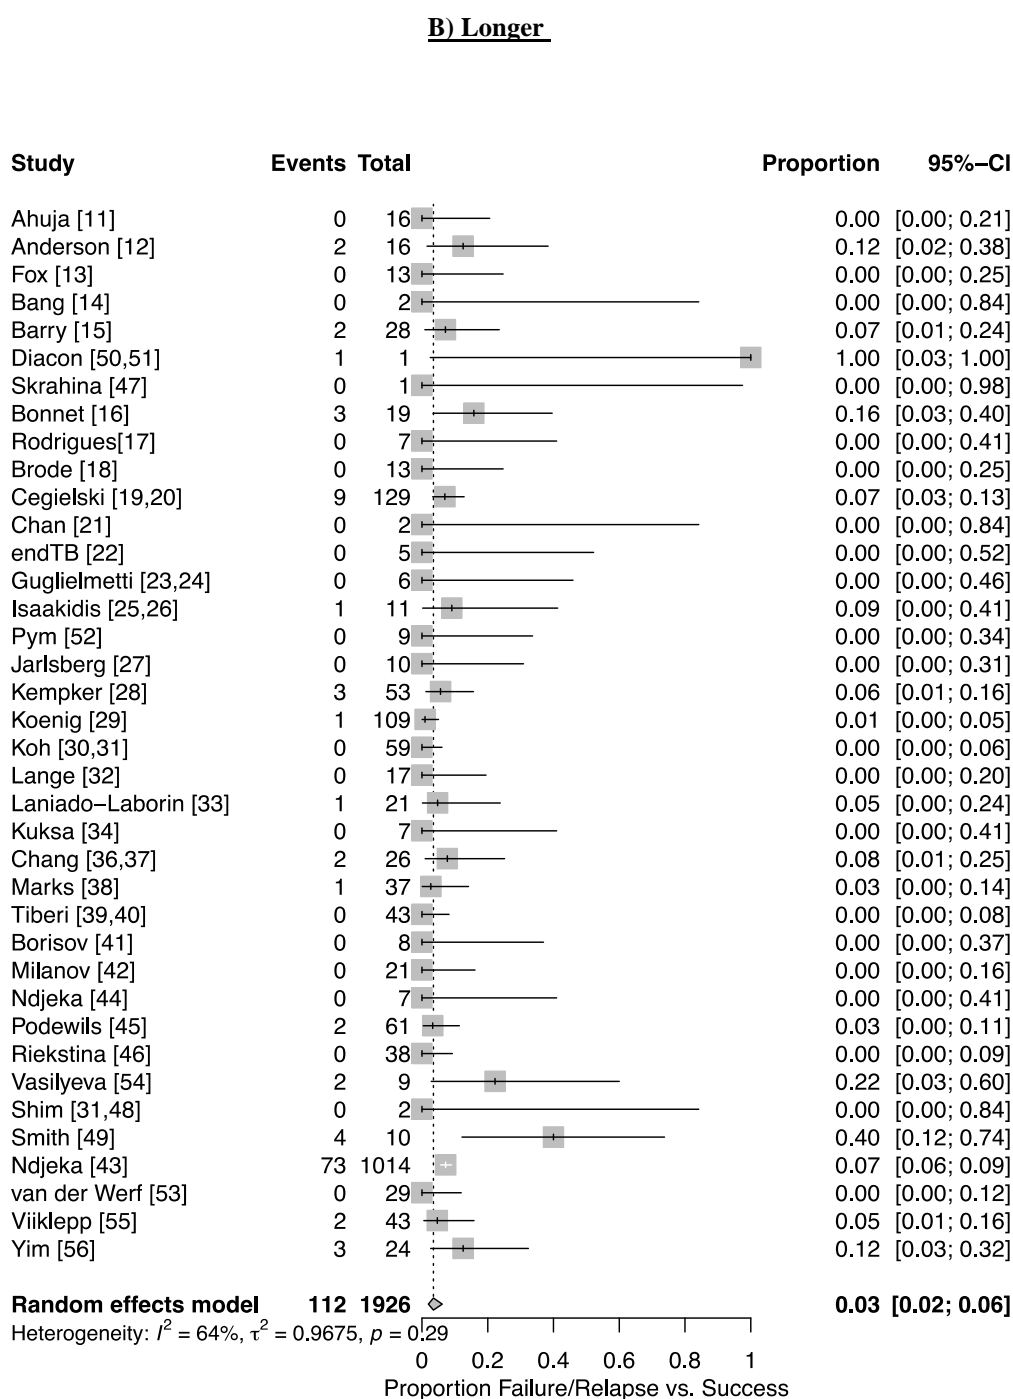

**Appendix Figure A3. Proportion of Death vs. Success, comparing shorter & longer MDR-TB regimens**

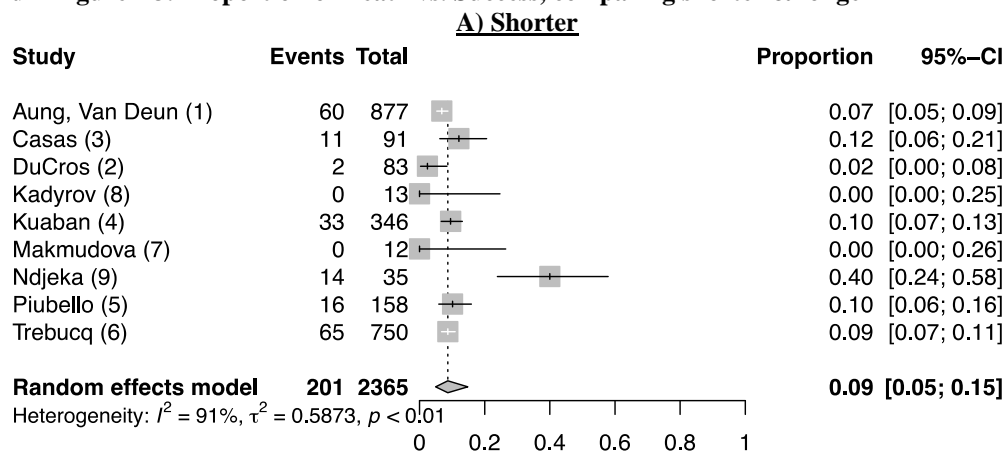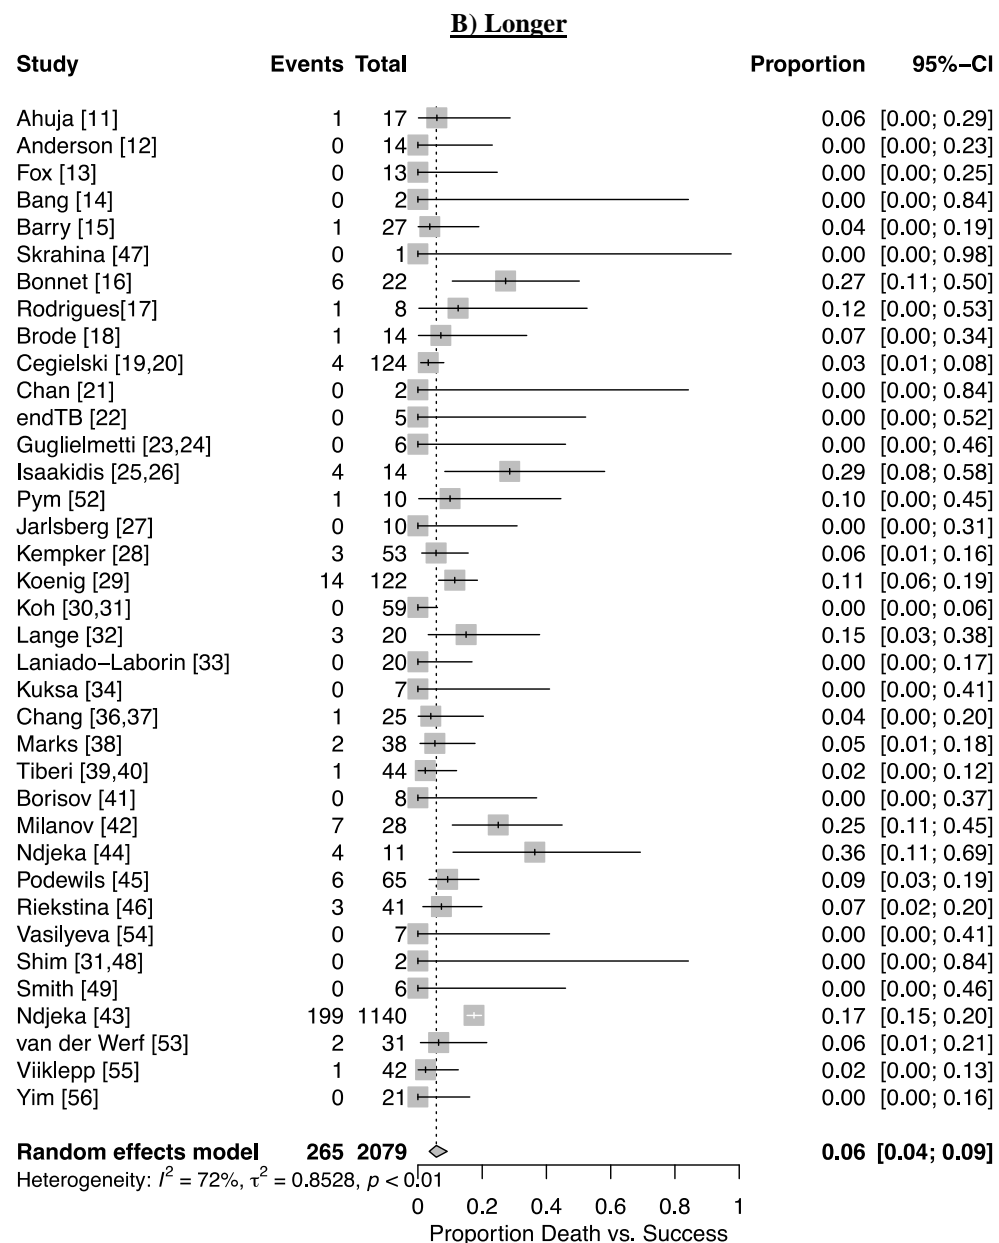



**Appendix Figure A4. Proportion of Lost vs. Success, Failure, or Relapse comparing shorter & longer MDR-TB regimens**

**A) Shorter**

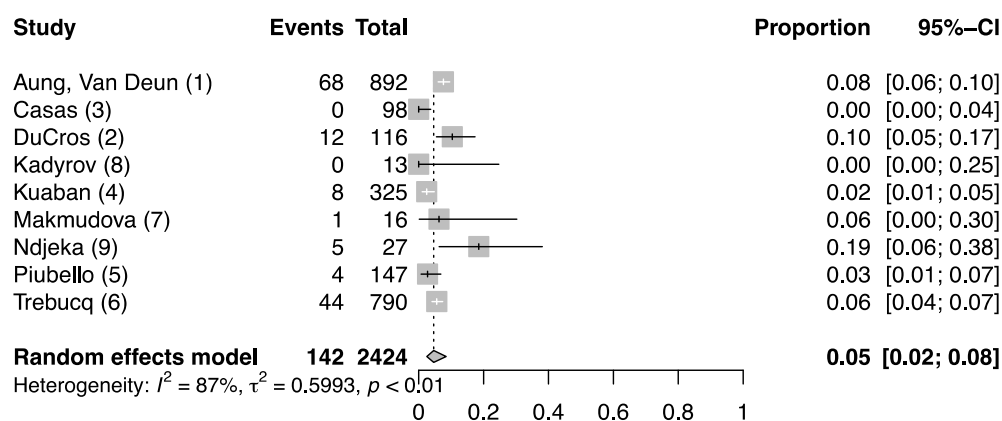

**B) Longer**

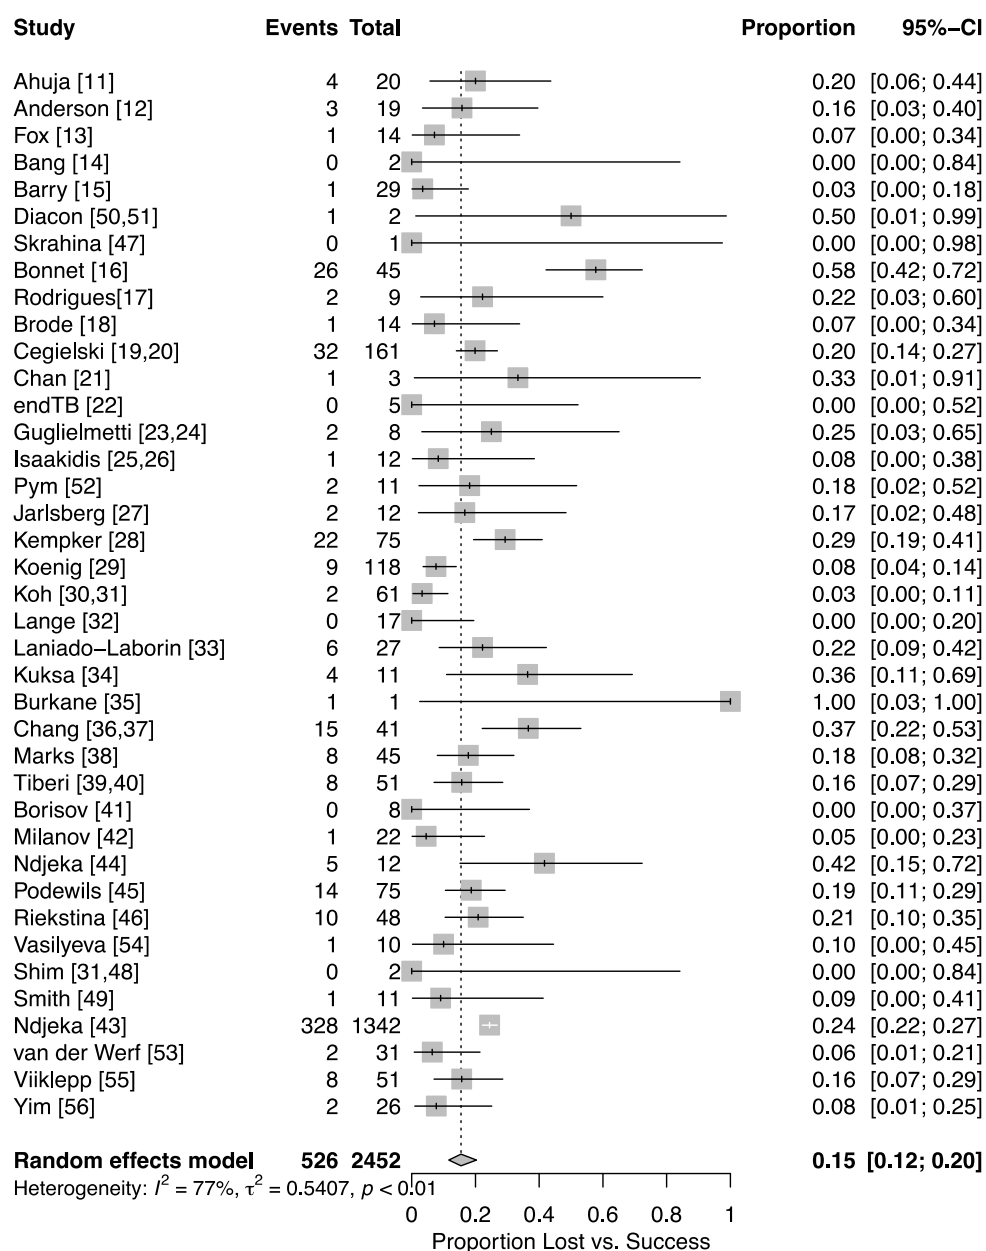

**Appendix Table A4: Odds ratios for associations of covariates with outcomes, using univariable individual patient-data meta-regression**

| Covariates                                                            | Odds ratio (95%CI)      |                            |                                                |
|-----------------------------------------------------------------------|-------------------------|----------------------------|------------------------------------------------|
|                                                                       | Fail/relapse vs Success | Death vs Success           | Loss to follow-up vs Success, Failure, Relapse |
| Age (per 1 year older)                                                | 1·0 (0·99-1·01)         | <b>1·04 (1·03-1·05)</b>    | 1·0 (0·99-1·01)                                |
| Sex (reference: female)                                               | 1·0 (0·7-1·3)           | 1·0 (0·8-1·2)              | <b>1·5 (1·3-1·8)</b>                           |
| PLWH (reference: HIV negative people)                                 | 1·1 (0·8-1·6)           | <b>2·8 (2·1-3·6)</b>       | 1·0 (0·8-1·3)                                  |
| Extensive disease (reference: not extensive)                          | <b>1·4 (0·98-2)</b>     | 1·1 (0·9-1·4)              | 1·1 (0·9-1·3)                                  |
| Prior treatment with first-line drugs (reference: no prior treatment) | 1·0 (0·8-1·4)           | <b>1·3 (1·0-1·6)</b>       | <b>1·3 (1·04-1·5)</b>                          |
| Pyrazinamide resistance (reference: sensitive to pyrazinamide)        | <b>1·6 (0·96-2·7)</b>   | 1·4 (0·9-2·1) <sup>F</sup> | <b>0·6 (0·4-0·9)</b>                           |
| Prothionamide* resistance (reference: sensitive to prothionamide*)    | 1·4 (0·7-2·7)           | 0·8 (0·5-1·3)              | 1·0 (0·7-1·5)                                  |
| Ethambutol resistance (reference: sensitive to ethambutol)            | <b>2·9 (1·6-5·3)</b>    | 1·2 (0·9-1·7)              | 0·8 (0·6-1·1)                                  |

**Confidence intervals suggestive of increased odds or risk of failure or relapse are in bold red font.**

**Confidence intervals suggestive of lower odds or risk of failure or relapse are in bold black font.**

Data are unadjusted odds ratios (95% CI) from random-effects meta-regression. PLWH: people living with HIV infection.

*F*: fixed effects model used as random-effects model did not converge.

\*Or ethionamide.

**Appendix Table A5: Comparison of shorter regimens to longer regimens amongst patients with rifampin or multidrug-resistant tuberculosis confirmed susceptible to fluoroquinolones and additionally resistant to at least two of: pyrazinamide, ethambutol, or prothionamide/ethionamide, using individual patient-data meta-analysis**

|                                                      | Studies<br>Shorter,<br>Longer | Shorter<br>Events/<br>Total | Longer<br>Events/<br>Total | Propensity score matched multivariable meta-regression |                                    |                             |
|------------------------------------------------------|-------------------------------|-----------------------------|----------------------------|--------------------------------------------------------|------------------------------------|-----------------------------|
|                                                      |                               |                             |                            | N Pairs                                                | aOR (95%CI)                        | aRD (95% CI)                |
| Fail/relapse vs Success                              | 7, 27                         | 31/244                      | 13/324                     | 244                                                    | <b>5·2 (1·5, 17·6)<sup>F</sup></b> | <b>0·10 (0·05, 0·15)</b>    |
| Death during first 12 months of treatment vs Success | 6, 24                         | 14/227                      | 27/338                     | 227                                                    | 0·4 (0·1, 1·9)                     | -0·03 (-0·09, 0·03)         |
| Lost vs Success, Fail/relapse                        | 7, 24                         | 13/257                      | 53/377                     | 257                                                    | 0·2 (0·0, 1·8)                     | <b>-0·08 (-0·14, -0·02)</b> |

All models adjust for age, sex, HIV status, previous treatment with first-line tuberculosis medications, and extensiveness of disease. Results were adjusted as described in the Methods. aOR: adjusted odds ratio; aRD: adjusted risk difference.

*F*: fixed effects model used as random-effects model did not converge.

**Appendix Table A6: Characteristics of patients included in the comparison of moxifloxacin- or levofloxacin-based shorter regimens with longer regimens composed per 2018 World Health Organization guidelines including either bedaquiline or linezolid**

|                                                       | Shorter, n=1004 | Longer, n=162 |
|-------------------------------------------------------|-----------------|---------------|
| <b>Baseline characteristics</b>                       | 1004            | 162           |
| Mean Age (standard deviation)                         | 35.5 (12.8)     | 39.2 (13.2)   |
| Male Sex                                              | 594 (59.2%)     | 96 (59.3%)    |
| People living with HIV                                | 204 (20.4%)     | 93 (57.4%)    |
| Antiretroviral treatment                              | 175 (90.2%)     | 93 (100%)     |
| Extensive disease                                     | 834 (83.1%)     | 131 (80.9%)   |
| Previous Treatment with First Line Drugs              | 780 (82.5%)     | 73 (45.9%)    |
| High Income Country                                   | 0 (0%)          | 12 (7.4%)     |
| Upper Middle Income Country                           | 41 (4.1%)       | 149 (92%)     |
| Low Middle or Low Income Country                      | 963 (95.9%)     | 1 (0.6%)      |
| Pyrazinamide-resistant tuberculosis                   | 226 (59%)       | 17 (77.3%)    |
| Ethambutol-resistant tuberculosis                     | 224 (67.3%)     | 18 (78.3%)    |
| Ethionamide/Prothionamide-resistant tuberculosis      | 156 (50.2%)     | 13 (61.9%)    |
| <b>Total number of drugs in regimen, median (IQR)</b> | 7               | 7 (6-8)*      |
| <b>WHO 2018 Group A Drugs in regimen</b>              |                 |               |
| <b>Moxifloxacin or levofloxacin</b>                   | 1004 (100%)     | 162 (100%)    |
| <b>Bedaquiline</b>                                    | 0               | 151(93.2%)    |
| <b>Linezolid</b>                                      | 0               | 144(88.9%)    |
| <b>WHO 2018 Group B Drugs in regimen</b>              |                 |               |
| <b>Cycloserine</b>                                    | 0               | 16(9.9%)      |
| <b>Clofazimine</b>                                    | 1004 (100%)     | 122(75.3%)    |

Restricted to patients with tuberculosis confirmed susceptible to fluoroquinolones.

\*This is the number of drugs given for > 1 month, not all of which may have been given concomitantly.

**Appendix Table A7A. Sensitivity Analysis: Comparison of shorter regimens to longer regimens amongst patients with rifampin-resistant and isoniazid-susceptible tuberculosis, rifampin-resistant tuberculosis with unmeasured DST for isoniazid, or multidrug-resistant tuberculosis, using individual patient-data meta-analysis**

|                                                    | Studies<br>Shorter,<br>Longer | Shorter<br>Events/<br>Total | Longer<br>Events/<br>Total | Propensity score matched multivariable meta-regression |                 |                      |
|----------------------------------------------------|-------------------------------|-----------------------------|----------------------------|--------------------------------------------------------|-----------------|----------------------|
|                                                    |                               |                             |                            | N Pairs                                                | aOR (95%CI)     | aRD (95% CI)         |
| (A) Including patients with INH-susceptible, RR-TB |                               |                             |                            |                                                        |                 |                      |
| Fail/relapse vs Success                            | 9, 38                         | 123/2478                    | 115/1953                   | 1953                                                   | 1.5 (0.8, 3.0)  | 0.02 (-0.01, 0.04)   |
| Death vs Success                                   | 9, 37                         | 225/2580                    | 268/2106                   | 2106                                                   | 1.2 (0.96, 1.5) | 0.02 (-0.01, 0.05)   |
| Lost vs Success, Fail/relapse                      | 9, 39                         | 149/2627                    | 533/2486                   | 2486                                                   | 0.2 (0.2, 0.3)  | -0.15 (-0.17, -0.13) |

All models adjust for age, sex, HIV status, previous treatment with first-line tuberculosis medications, and extensiveness of disease. Results were adjusted as described in the Methods. aOR: adjusted odds ratio; aRD: adjusted risk difference.

**Appendix Table A7B. Sensitivity Analysis: Comparison of shorter regimens to longer regimens amongst patients with rifampin- or multidrug-resistant tuberculosis confirmed resistant to fluoroquinolones, using individual patient-data meta-analysis**

|                               | Studies<br>Shorter,<br>Longer | Shorter<br>Events/<br>Total | Longer<br>Events/<br>Total | Propensity score matched multivariable meta-regression |                  |                     |
|-------------------------------|-------------------------------|-----------------------------|----------------------------|--------------------------------------------------------|------------------|---------------------|
|                               |                               |                             |                            | N Pairs                                                | aOR (95%CI)      | aRD (95% CI)        |
| (B) Fluoroquinolone-resistant |                               |                             |                            |                                                        |                  |                     |
| Fail/relapse vs Success       | 4, 15                         | 39/103                      | 10/130                     | 103                                                    | 15.0 (2.8, 80.6) | 0.33 (0.22, 0.44)   |
| Death vs Success              | 4, 16                         | 8/72                        | 14/134                     | 72                                                     | 2.1 (0.3, 17.0)  | 0.04 (-0.08, 0.15)  |
| Lost vs Success, Fail/relapse | 4, 17                         | 8/111                       | 37/167                     | 111                                                    | 0.3 (0.1, 1.4)   | -0.11 (-0.25, 0.03) |

All models adjust for age, sex, HIV status, previous treatment with first-line tuberculosis medications, and extensiveness of disease. Results were adjusted as described in the Methods. aOR: adjusted odds ratio; aRD: adjusted risk difference.

## References for Appendix

1. Aung KJ, Van Deun A, Declercq E, et al. Successful '9-month Bangladesh regimen' for multidrug-resistant tuberculosis among over 500 consecutive patients. *Int J Tuberc Lung Dis* 2014; **18**(10): 1180-7.
2. Van Deun A, Maug AK, Hamid Salim MA, et al. Short, highly effective, and inexpensive standardized treatment of multidrug-resistant tuberculosis. *Am J Resp Crit Care Med* 2010; **182**(5): 684-92.
3. Médecins Sans Frontières Manson Unit, Ministry of Health Uzbekistan. Unpublished data. 2018.
4. Médecins Sans Frontières Operational Center Amsterdam, MSF-OCA Swaziland, Ministry of Health Swaziland. Unpublished data. 2018.
5. Kuaban C, Noeske J, Rieder HL, Ait-Khaled N, Abena Foe JL, Trebucq A. High effectiveness of a 12-month regimen for MDR-TB patients in Cameroon. *Int J Tuberc Lung Dis* 2015; **19**(5): 517-24.
6. Piubello A, Harouna SH, Souleymane MB, et al. High cure rate with standardised short-course multidrug-resistant tuberculosis treatment in Niger: no relapses. *Int J Tuberc Lung Dis* 2014; **18**(10): 1188-94.
7. Trebucq A, Schwoebel V, Kashongwe Z, et al. Treatment outcome with a short multidrug-resistant tuberculosis regimen in nine African countries. *Int J Tuberc Lung Dis* 2018; **22**(1): 17-25.
8. Republic of Tajikistan TB Centre and KNCV. Unpublished data. 2018.
9. Kyrgyz Republic and KNCV. Unpublished data. 2018.
10. South African Ministry of Health. Unpublished Data. 2018.
11. Anger HA, Dworkin F, Sharma S, Munsiff SS, Nilsen DM, Ahuja SD. Linezolid use for treatment of multidrug-resistant and extensively drug-resistant tuberculosis, New York City, 2000-06. *J Antimicrob Chemother* 2010; **65**(4): 775-83.
12. Anderson LF, Tamne S, Watson JP, et al. Treatment outcome of multi-drug resistant tuberculosis in the United Kingdom: retrospective-prospective cohort study from 2004 to 2007. *Euro Surveill* 2013; **18**(40).
13. Fox G. Unpublished data (Australia). 2018.
14. Bang DL, T.; Thomsen, V. O.; Andersen, A. B. Multidrug-resistant tuberculosis: Treatment outcome in Denmark, 1992-2007. *Scand J Infect Dis* 2010; **42**(4): 288-93.
15. Barry PM, Flood J, Lowenthal P, Westenhouse J, California Department of Public Health. Unpublished data (California, USA). 2016.
16. Bonnet M, Pardini M, Meacci F, et al. Treatment of tuberculosis in a region with high drug resistance: outcomes, drug resistance amplification and re-infection. *PLoS ONE* 2011; **6**(8): e23081.
17. Rodrigues. Unpublished data (Brazil). 2018.
18. Brode S, West Park Healthcare Centre. Unpublished data (Toronto, Canada). 2016.
19. Cegielski JP, Kurbatova E, van der Walt M, et al. Multidrug-Resistant Tuberculosis Treatment Outcomes in Relation to Treatment and Initial Versus Acquired Second-Line Drug Resistance. *Clin Infect Dis* 2016; **62**(4): 418-30.
20. Yuen CM, Kurbatova EV, Tupasi T, et al. Association between Regimen Composition and Treatment Response in Patients with Multidrug-Resistant Tuberculosis: A Prospective Cohort Study. *PLoS Med* 2015; **12**(12): e1001932.
21. Chan ED, National Jewish Health. Unpublished data (Denver, USA). 2016.
22. endTB investigators. Unpublished data. 2018.
23. Guglielmetti L, Jaspard M, Le Du D, et al. Long-term outcome and safety of prolonged bedaquiline treatment for multidrug-resistant tuberculosis. *Eur Respir J* 2017; **49**(3).
24. Guglielmetti L, Le Du D, Jachym M, et al. Compassionate use of bedaquiline for the treatment of multidrug-resistant and extensively drug-resistant tuberculosis: interim analysis of a French cohort. *Clin Infect Dis* 2015; **60**(2): 188-94.
25. Isaakidis P, Varghese B, Mansoor H, et al. Adverse events among HIV/MDR-TB co-infected patients receiving antiretroviral and second line anti-TB treatment in Mumbai, India. *PLoS ONE* 2012; **7**(7): e40781.
26. Hughes J, Isaakidis P, Andries A, et al. Linezolid for multidrug-resistant tuberculosis in HIV-infected and -uninfected patients. *Eur Respir J* 2015; **46**(1): 271-4.
27. Jarlsberg L, Nahid P. Unpublished data (San Francisco, USA). 2016.
28. Kempker RR, Kipiani M, Mirtskhulava V, Tukvadze N, Magee MJ, Blumberg HM. Acquired Drug Resistance in Mycobacterium tuberculosis and Poor Outcomes among Patients with Multidrug-Resistant Tuberculosis. *Emerg Infect Dis* 2015; **21**(6): 992-1001.
29. Charles M, Vilbrun SC, Koenig SP, et al. Treatment outcomes for patients with multidrug-resistant tuberculosis in post-earthquake Port-au-Prince, Haiti. *Am J Trop Med Hyg* 2014; **91**(4): 715-21.
30. Jeong BH, Jeon K, Park HY, et al. Outcomes of pulmonary MDR-TB: impacts of fluoroquinolone resistance and linezolid treatment. *J Antimicrob Chemother* 2015; **70**(11): 3127-33.
31. Koh WJ, Kang YR, Jeon K, et al. Daily 300 mg dose of linezolid for multidrug-resistant and extensively drug-resistant tuberculosis: updated analysis of 51 patients. *J Antimicrob Chemother* 2012; **67**(6): 1503-7.

32. Eker B, Ortmann J, Migliori GB, et al. Multidrug- and extensively drug-resistant tuberculosis, Germany. *Emerg Infect Dis* 2008; **14**(11): 1700-6.
33. Laniado-Laborin R, Estrada-Guzman J, Perez H, Batiz-Armenta F, Alcantar-Schramm JM. Treatment of multidrug-resistant tuberculosis in a high-prevalence region through a binational consortium. *Int J Tuberc Lung Dis* 2012; **16**(5): 610-1.
34. Kuksa L. Unpublished data (Latvia). 2018.
35. Barkane. Unpublished data (Latvia, Delamanid). 2018.
36. Chang KC, Yew WW, Cheung SW, et al. Can intermittent dosing optimize prolonged linezolid treatment of difficult multidrug-resistant tuberculosis? *Antimicrob Agents Chemother* 2013; **57**(7): 3445-9.
37. Chang KC, Leung CC, Yew WW, et al. Pyrazinamide may improve fluoroquinolone-based treatment of multidrug-resistant tuberculosis. *Antimicrob Agents Chemother* 2012; **56**(11): 5465-75.
38. Marks SM, Flood J, Seaworth B, et al. Treatment practices, outcomes, and costs of multidrug-resistant and extensively drug-resistant tuberculosis, United States, 2005-2007. *Emerg Infect Dis* 2014; **20**(5): 812-21.
39. Tiberi S, Payen MC, Sotgiu G, et al. Effectiveness and safety of meropenem/clavulanate-containing regimens in the treatment of MDR- and XDR-TB. *Eur Respir J* 2016; **47**(4): 1235-43.
40. Tiberi S, Sotgiu G, D'Ambrosio L, et al. Comparison of effectiveness and safety of imipenem/clavulanate-versus meropenem/clavulanate-containing regimens in the treatment of MDR- and XDR-TB. *Eur Respir J* 2016; **47**(6): 1758-66.
41. Borisov SE, Dheda K, Enwerem M, et al. Effectiveness and safety of bedaquiline-containing regimens in the treatment of MDR- and XDR-TB: a multicentre study. *Eur Respir J* 2017; **49**(5).
42. Milanov V, Falzon D, Zamfirova M, et al. Factors associated with treatment success and death in cases with multidrug-resistant tuberculosis in Bulgaria, 2009-2010. *International journal of mycobacteriology* 2015; **4**(2): 131-7.
43. Ndjeka N. Unpublished data (South Africa). 2018.
44. Ndjeka N, Conradie F, Schnippel K, et al. Treatment of drug-resistant tuberculosis with bedaquiline in a high HIV prevalence setting: an interim cohort analysis. *Int J Tuberc Lung Dis* 2015; **19**(8): 979-85.
45. Podewils LJ, Gler MT, Quelapio MI, Chen MP. Patterns of treatment interruption among patients with multidrug-resistant TB (MDR TB) and association with interim and final treatment outcomes. *PLoS ONE* 2013; **8**(7): e70064.
46. Riekstina V, Leimane V, Cirule A, Kuksa L, Latvia National TB registry. Unpublished data (Latvia). 2016.
47. Skrahina A. Unpublished data (Belarus). 2018.
48. Jo KW, Lee SD, Kim WS, Kim DS, Shim TS. Treatment outcomes and moxifloxacin susceptibility in ofloxacin-resistant multidrug-resistant tuberculosis. *Int J Tuberc Lung Dis* 2014; **18**(1): 39-43.
49. Smith SE, Ershova J, Vlasova N, et al. Risk factors for acquisition of drug resistance during multidrug-resistant tuberculosis treatment, Arkhangelsk Oblast, Russia, 2005-2010. *Emerg Infect Dis* 2015; **21**(6): 1002-11.
50. Diacon AH, Pym A, Grobusch MP, et al. Multidrug-resistant tuberculosis and culture conversion with bedaquiline. *N Engl J Med* 2014; **371**(8): 723-32.
51. Diacon AH, Pym A, Grobusch M, et al. The diarylquinoline TMC207 for multidrug-resistant tuberculosis. *N Engl J Med* 2009; **360**(23): 2397-405.
52. Pym AS, Diacon AH, Tang SJ, et al. Bedaquiline in the treatment of multidrug- and extensively drug-resistant tuberculosis. *Eur Respir J* 2016; **47**(2): 564-74.
53. van Altena R, de Vries G, Haar CH, et al. Highly successful treatment outcome of multidrug-resistant tuberculosis in the Netherlands, 2000-2009. *Int J Tuberc Lung Dis* 2015; **19**(4): 406-12.
54. Vasilyeva I. Unpublished data (Russia). 2018.
55. Viiklepp P, Estonian TB Registry. Unpublished data (Estonia). 2016.
56. Kwak N, Kim HR, Yoo CG, Kim YW, Han SK, Yim JJ. Changes in treatment outcomes of multidrug-resistant tuberculosis. *Int J Tuberc Lung Dis* 2015; **19**(5): 525-30.
